# Supplementary material for: Dietary protein level affects iridescent coloration in Anna's hummingbirds, Calypte anna
Source: Oxford University Press journal article supplement (doi:10.1242/jeb.069351), 2012-07-25
Supplement: jeb069351tabless1-s2.pdf [file jeb069351tabless1-s2.pdf]

Table S1. Composition of 3 and 6% protein dry diets

| Ingredient                        | 3% Protein diet | 6% Protein diet |
|-----------------------------------|-----------------|-----------------|
| Sucrose                           | 94.76           | 91.19           |
| Isolated soy protein <sup>a</sup> | 3.51            | 7.03            |
| DL-methionine                     | 0.05            | 0.10            |
| Minerals <sup>b</sup>             | 0.63            | 0.63            |
| Vitamins <sup>c</sup>             | 0.05            | 0.05            |
| Soy oil                           | 1.00            | 1.00            |

These diets were altered according to unpublished work by T.E.R. and H.

Frederick in collaboration with the Arizona-Sonora Desert Museum, Tucson, AZ, and based loosely upon a standard reference diet for growing chicks (Subcommittee on Poultry Nutrition et al., 1994).

<sup>a</sup>Isolated soy protein (Supro 500E, Solae Co., St Louis, MO, USA) contains a small amount of moisture, ash and fat and has a protein content of 88%. The indicated amounts are needed to result in 3 and 6% protein.

<sup>b</sup>Mineral mix supplies the following in mg kg<sup>-1</sup> of diet: dicalcium phosphate 2537, potassium chloride 1458, sodium chloride 1296, calcium carbonate 898, magnesium oxide 83.25, manganese sulfate 14.25, zinc oxide 6.11, ethylene diamine dihydriodide 3.65, copper oxide 1.62, 1% selenium on salt 1.03.

<sup>c</sup>Vitamin mix supplies the following per kg of diet: vitamin A 1564 IU, vitamin D<sub>3</sub> 350 ICU, vitamin E 10 IU, choline chloride 187 mg, niacin 19.5 mg, ethoxyquin 10.5 mg, calcium pantothenate 6.33 mg, riboflavin 1.63 mg, pyridoxine 1.56 mg, thiamin 0.78 mg, menadione 0.43 mg, folic acid 0.40 mg, biotin 0.073 mg, vitamin B<sub>12</sub> 0.011 mg.

Table S2. Amino acid composition of protein from isolated soy protein and separately added methionine used in both 3 and 6% protein diets

| Amino acid    | Compositions (g 100 g <sup>-1</sup> protein) |
|---------------|----------------------------------------------|
| Alanine       | 4.3                                          |
| Arginine      | 7.6                                          |
| Aspartic acid | 11.6                                         |
| Cysteine      | 1.3                                          |
| Glutamic acid | 19.1                                         |
| Glycine       | 4.2                                          |
| Histidine     | 2.6                                          |
| Isoleucine    | 4.9                                          |
| Leucine       | 8.2                                          |
| Lysine        | 6.3                                          |
| Methionine    | 3.0                                          |
| Phenylalanine | 5.2                                          |
| Proline       | 5.1                                          |
| Serine        | 5.2                                          |
| Threonine     | 3.8                                          |
| Tryptophan    | 1.3                                          |
| Tyrosine      | 3.8                                          |
| Valine        | 5.1                                          |

The composition of dietarily important amino acids in isolated soy protein was provided by the manufacturer (Solae Co.) and pure methionine was measured and added by T.E.R. to balance the amino acid profile of the isolated soy protein (T.E.R. and H. Frederick, unpublished data).
